# Supplementary material
Source: publisher figshare collection journal article supplement (https://sage.figshare.com/ndownloader/files/17470679)
Supplement: Supplementary file 1 [file 17470679]

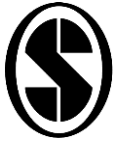

## Appendix

Appendix to: *Penne, T., Hufkens, T, Goedemé, T and Storms, B. (2019) “To what extent do welfare states compensate for the cost of children? The joint impact of taxes, benefits and public goods and services” in Journal of European Social Policy.*

**Appendix Table 1.** Categories of essential goods and services included in the reference budgets for families with children (ImPRovE budgets, 2014)

|          |                                                                                                                                                    |
|----------|----------------------------------------------------------------------------------------------------------------------------------------------------|
| Housing  | rent, utility costs, taxes<br>estimated at 30th percentile (EU-SILC 2012)<br>meeting list of quality criteria                                      |
| Food     | liquids<br>bread, grains, potatoes<br>fruit & vegetables<br>dairy<br>meat, fish, eggs<br>fats & residual<br>kitchen equipment<br>physical activity |
| Clothing | coats<br>sweaters<br>shirts & tops<br>pants/dresses<br>sport clothes<br>underwear & socks<br>accessories                                           |



|                              |                                                                                                                                                                                                                                                                             |
|------------------------------|-----------------------------------------------------------------------------------------------------------------------------------------------------------------------------------------------------------------------------------------------------------------------------|
|                              | shoes<br>maintenance, repair & storage                                                                                                                                                                                                                                      |
| Personal care                | hand hygiene<br>mouth hygiene<br>body hygiene<br>cosmetics and perfume<br>intimate hygiene women/girls<br>shaving<br>toiletry bag<br>hair care<br>basic bathroom equipment (e.g. mat, rubbish bin)                                                                          |
| Rest and leisure             | bed with necessities<br>fold-out sofa<br>accessories (bedside table, lamp)<br>domestic leisure (e.g. TV, radio) + access to library<br>non-organised leisure (pub, cultural activities)<br>organised leisure (membership association)<br>babysit<br>yearly domestic holiday |
| Maintaining social relations | visits of family and friends (+ extra dinnerware & chairs)<br>take away food/ eating out<br>computer with internet<br>printer and camera<br>mobile phone (for adults)<br>celebrations, cards and presents<br>obligations as a citizen<br>cheerfulness at home               |
| Safe childhood               | day trip<br>mobile phone (teenagers)                                                                                                                                                                                                                                        |



|                                                 |                                                                                                                                                                                                                                                                                                |
|-------------------------------------------------|------------------------------------------------------------------------------------------------------------------------------------------------------------------------------------------------------------------------------------------------------------------------------------------------|
|                                                 | birthday party (< 12 years)<br>youth association<br>toys<br>cultural activities<br>pocket money                                                                                                                                                                                                |
| Mobility                                        | Bicycle and bicycle equipment and repair                                                                                                                                                                                                                                                       |
| <b>Publicly provided or subsidised services</b> |                                                                                                                                                                                                                                                                                                |
| Health care                                     | consult GP (every day diseases, minor traumata)<br>consult dentist (+ filling tooth)<br>sun glasses and -lotion<br>family medicine chest (common medicines, plasters & bandages)<br>medical prevention (vaccines)<br>contraception<br>health insurance                                         |
| Education*                                      | enrolment fee<br>compulsory insurances<br>compulsory school uniform<br>compulsory school books<br>notebooks, cover paper, files<br>school- and gym bag<br>case holder & writing material<br>desk & chair<br>lunchbox & thermos (if no lunch at school)<br>extracurricular activity/ field trip |
| Public transport                                | annual card for use of public transport in the city<br>budget to travel outside the city occasionally (holiday & day trip)                                                                                                                                                                     |

\*Note: for secondary education, we have calculated the average costs required for studying a general discipline (no specialization) in a public school.

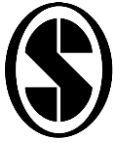

**Appendix 2.** Child cost compensation indicator for different household types. The child benefit package for single earners working full time at 40, 100 or 150% of the average national wage, expressed as a percentage of the essential cost of one or two children (10 and 14y), living in a single parent or couple family, 2014.

**Table 2.1.** Child cost compensation for private tenants.

|                  |                        | PRIVATE TENANTS |               |                       |                      |               |                       |
|------------------|------------------------|-----------------|---------------|-----------------------|----------------------|---------------|-----------------------|
|                  |                        | Single parent   |               |                       | Couple single earner |               |                       |
|                  | % of OECD average wage | 1 child (10y)   | 1 child (14y) | 2 children (10y, 14y) | 1 child (10y)        | 1 child (14y) | 2 children (10y, 14y) |
| <b>Athens</b>    | <b>40%</b>             | 0.13            | 0.12          | 0.12                  | 0.11                 | 0.10          | 0.11                  |
|                  | <b>100%</b>            | 0.03            | 0.03          | 0.06                  | 0.06                 | 0.06          | 0.06                  |
|                  | <b>150%</b>            | 0.00            | 0.00          | 0.03                  | 0.03                 | 0.03          | 0.03                  |
| <b>Barcelona</b> | <b>40%</b>             | 0.06            | 0.05          | 0.06                  | 0.06                 | 0.05          | 0.06                  |
|                  | <b>100%</b>            | 0.38            | 0.30          | 0.22                  | 0.10                 | 0.08          | 0.10                  |
|                  | <b>150%</b>            | 0.29            | 0.23          | 0.18                  | 0.10                 | 0.08          | 0.10                  |
| <b>Budapest</b>  | <b>40%</b>             | 0.30            | 0.23          | 0.30                  | 0.24                 | 0.19          | 0.24                  |
|                  | <b>100%</b>            | 0.25            | 0.20          | 0.21                  | 0.21                 | 0.16          | 0.20                  |
|                  | <b>150%</b>            | 0.25            | 0.20          | 0.21                  | 0.21                 | 0.16          | 0.18                  |
| <b>Milan</b>     | <b>40%</b>             | 0.41            | 0.32          | 0.33                  | 0.21                 | 0.17          | 0.24                  |
|                  | <b>100%</b>            | 0.28            | 0.22          | 0.31                  | 0.28                 | 0.22          | 0.31                  |
|                  | <b>150%</b>            | 0.22            | 0.17          | 0.20                  | 0.22                 | 0.17          | 0.20                  |
| <b>Helsinki*</b> | <b>40%</b>             | 1.02            | -             | 1,09                  | 0.52                 | -             | 0.79                  |
|                  | <b>100%</b>            | 0.32            | -             | 0.39                  | 0.22                 | -             | 0.27                  |
|                  | <b>150%</b>            | 0.32            | -             | 0.39                  | 0.22                 | -             | 0.27                  |
| <b>Antwerp</b>   | <b>40%</b>             | 0.58            | 0.47          | 0.58                  | 0.34                 | 0.33          | 0.43                  |
|                  | <b>100%</b>            | 0.43            | 0.39          | 0.50                  | 0.34                 | 0.32          | 0.46                  |
|                  | <b>150%</b>            | 0.43            | 0.39          | 0.50                  | 0.34                 | 0.32          | 0.46                  |



**Table 2.2.** Child cost compensation for outright owners.

|                  |                               | <b>OUTRIGHT OWNERS</b> |                      |                              |                             |                      |                              |
|------------------|-------------------------------|------------------------|----------------------|------------------------------|-----------------------------|----------------------|------------------------------|
|                  |                               | <b>Single parent</b>   |                      |                              | <b>Couple single earner</b> |                      |                              |
|                  | <b>% of OECD average wage</b> | <b>1 child (10y)</b>   | <b>1 child (14y)</b> | <b>2 children (10y, 14y)</b> | <b>1 child (10y)</b>        | <b>1 child (14y)</b> | <b>2 children (10y, 14y)</b> |
| <b>Athens</b>    | <b>40%</b>                    | 0.22                   | 0.20                 | 0.15                         | 0.09                        | 0.08                 | 0.09                         |
|                  | <b>100%</b>                   | 0.03                   | 0.02                 | 0.05                         | 0.03                        | 0.02                 | 0.05                         |
|                  | <b>150%</b>                   | 0.00                   | 0.00                 | 0.03                         | 0.00                        | 0.00                 | 0.03                         |
| <b>Barcelona</b> | <b>40%</b>                    | 0.06                   | 0.05                 | 0.06                         | 0.06                        | 0.05                 | 0.06                         |
|                  | <b>100%</b>                   | 0.31                   | 0.24                 | 0.18                         | 0.10                        | 0.08                 | 0.09                         |
|                  | <b>150%</b>                   | 0.29                   | 0.22                 | 0.18                         | 0.10                        | 0.08                 | 0.09                         |
| <b>Budapest</b>  | <b>40%</b>                    | 0.32                   | 0.24                 | 0.30                         | 0.27                        | 0.21                 | 0.28                         |
|                  | <b>100%</b>                   | 0.27                   | 0.21                 | 0.22                         | 0.25                        | 0.19                 | 0.22                         |
|                  | <b>150%</b>                   | 0.27                   | 0.21                 | 0.22                         | 0.25                        | 0.19                 | 0.20                         |
| <b>Milan</b>     | <b>40%</b>                    | 0.53                   | 0.40                 | 0.39                         | 0.53                        | 0.40                 | 0.39                         |
|                  | <b>100%</b>                   | 0.31                   | 0.24                 | 0.33                         | 0.31                        | 0.24                 | 0.33                         |
|                  | <b>150%</b>                   | 0.24                   | 0.19                 | 0.22                         | 0.24                        | 0.19                 | 0.22                         |
| <b>Helsinki*</b> | <b>40%</b>                    | 0.38                   | -                    | 0.66                         | 0.38                        | -                    | 0.66                         |
|                  | <b>100%</b>                   | 0.38                   | -                    | 0.42                         | 0.38                        | -                    | 0.42                         |
|                  | <b>150%</b>                   | 0.38                   | -                    | 0.42                         | 0.38                        | -                    | 0.42                         |
| <b>Antwerp</b>   | <b>40%</b>                    | 0.67                   | 0.53                 | 0.65                         | 0.67                        | 0.53                 | 0.65                         |
|                  | <b>100%</b>                   | 0.50                   | 0.44                 | 0.56                         | 0.50                        | 0.44                 | 0.56                         |
|                  | <b>150%</b>                   | 0.50                   | 0.44                 | 0.56                         | 0.50                        | 0.44                 | 0.56                         |

\*Note for both tables: In Helsinki the second child is 4 years instead of 14 years old

Note: The indicator is based on a comparison in Euros, both in the numerator and the denominator.

Source: own calculations using HHoT/EUROMOD 2014 & ImPRovE budgets 2014 (Goedemé et al, 2015)



**Appendix Table 3.** Government social expenditure on families with children, 2013 and latest available, expressed as % of GDP

|         | <b>Total</b> | <b>Cash</b> | <b>Tax breaks</b> | <b>ECEC &amp; services</b> | <b>Education (primary to secondary)</b> |
|---------|--------------|-------------|-------------------|----------------------------|-----------------------------------------|
| Greece* | 1.28         | 0.97        | /                 | 0.31                       | /                                       |
| Spain   | 4.15         | 0.52        | 0.12              | 0.82                       | 2.70                                    |
| Italy   | 4.69         | 0.76        | 0.55              | 0.65                       | 2.73                                    |
| Hungary | 6.22         | 1.91        | 0.69              | 1.05                       | 2.58                                    |
| Finland | 7.25         | 1.51        | 0.00              | 1.70                       | 4.05                                    |
| Belgium | 7.68         | 1.83        | 0.52              | 1.03                       | 4.30                                    |

Notes: Cash benefits include family benefits, allowances and parental leave benefits. Education includes primary to secondary education.

\*Data for Greece refer to 2012, and exclude expenditures on tax breaks and education.

Source: OECD Social expenditure database and OECD education database (accessed April 2018).
